# Supplementary material for: Electrochemically-gated graphene broadband microwave waveguides for ultrasensitive biosensing
Source: Royal Society of Chemistry journal article supplement (doi:10.1039/d3nr01239e), 2023-01-01
Supplement: d3nr01239e1.pdf [file d3nr01239e1.pdf]

## Supplementary information

Patrik Gubeljak<sup>†1,2</sup>, Tianhui Xu<sup>†2,3</sup>, Lorenzo Pedrazzetti<sup>2,4</sup>, Oliver J. Burton<sup>2</sup>, Luca Magagnin<sup>4</sup>, Stephan Hofmann<sup>2</sup>, George G. Malliaras<sup>2</sup>, and Antonio Lombardo<sup>\*2,3,5</sup>

<sup>1</sup>Cambridge Graphene Centre, Department of Engineering, University of Cambridge, United Kingdom

<sup>2</sup>Department of Engineering, University of Cambridge, United Kingdom

<sup>3</sup>Department of Electronic and Electrical Engineering, University College London, London, United Kingdom

<sup>4</sup>Dipartimento di Chimica, Materiali e Ingegneria Chimica “Giulio Natta”, Politecnico di Milano, Italy

<sup>5</sup>London Centre for Nanotechnology, University College London, United Kingdom

<sup>†</sup> These authors contributed equally to this work. \*Corresponding author: a.lombardo@ucl.ac.uk

# 1 Device and Setup

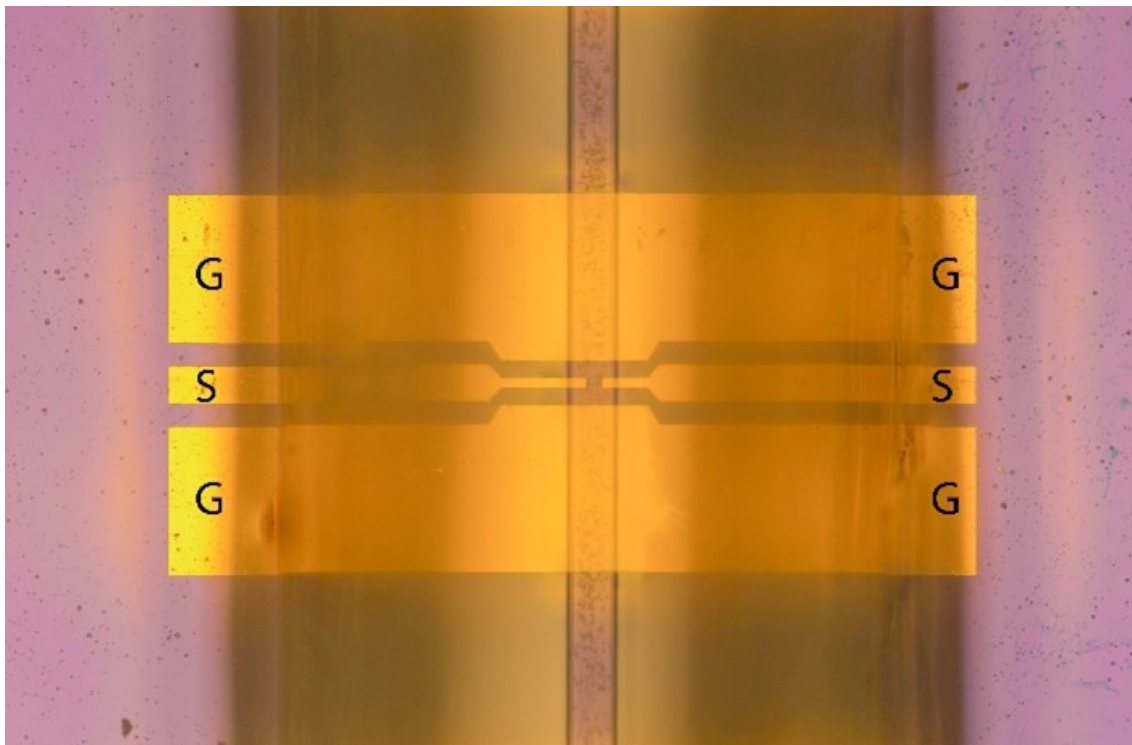

Figure 1: A focus-stacked composite image of devices in a PDMS microfluidic channel, with the two ports and the corresponding probe contacts (Ground-Signal-Ground).

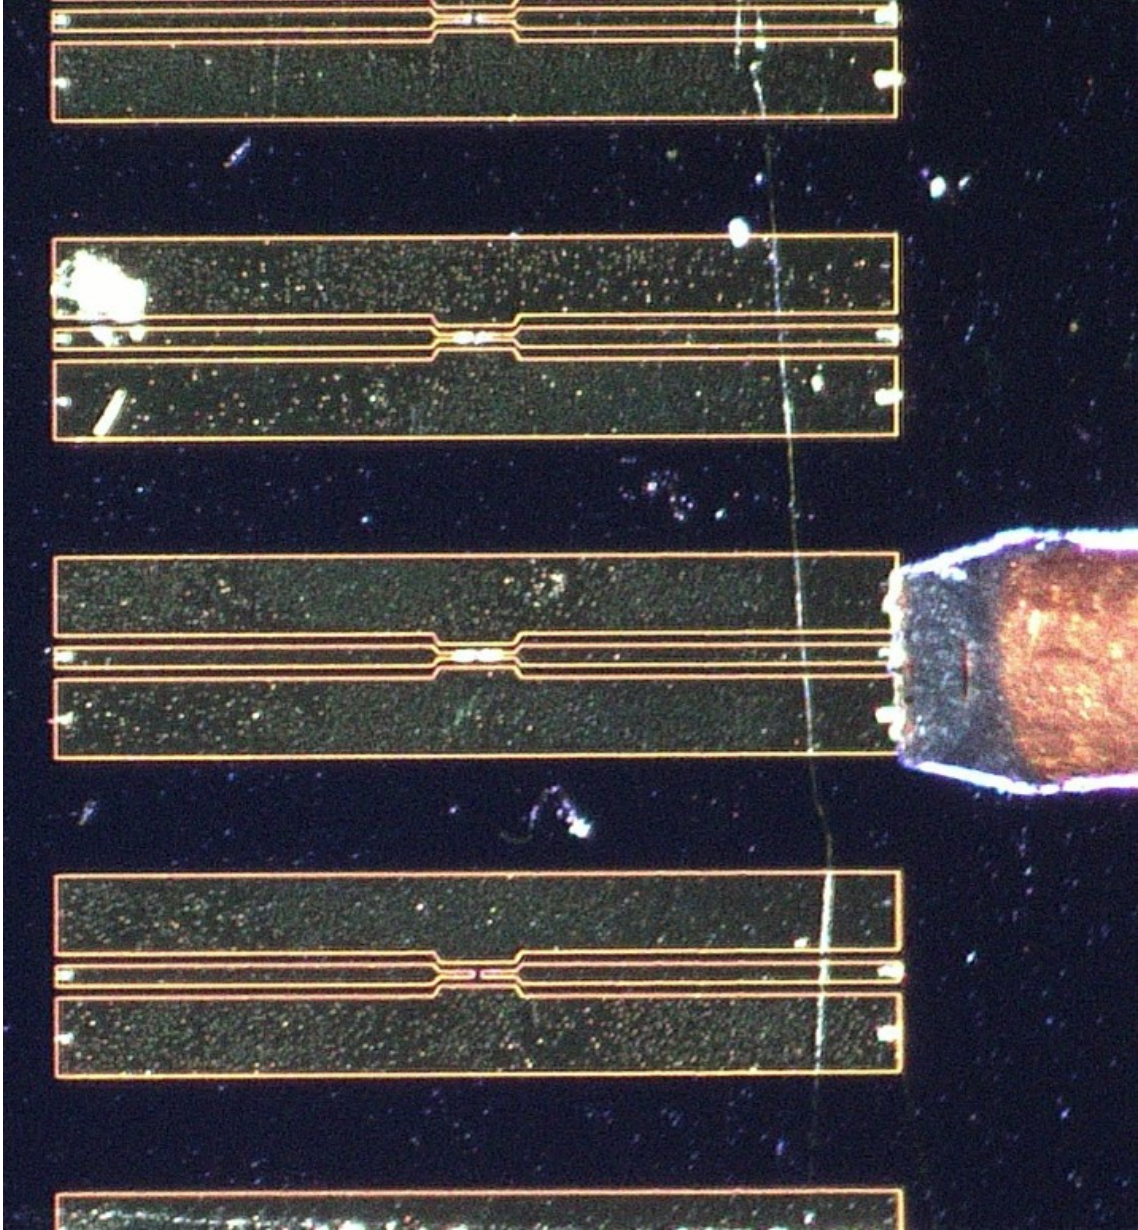

Figure 2: A landed GSG RF-probe on a graphene coplanar waveguide, before the fabrication of the microfluidic channel.



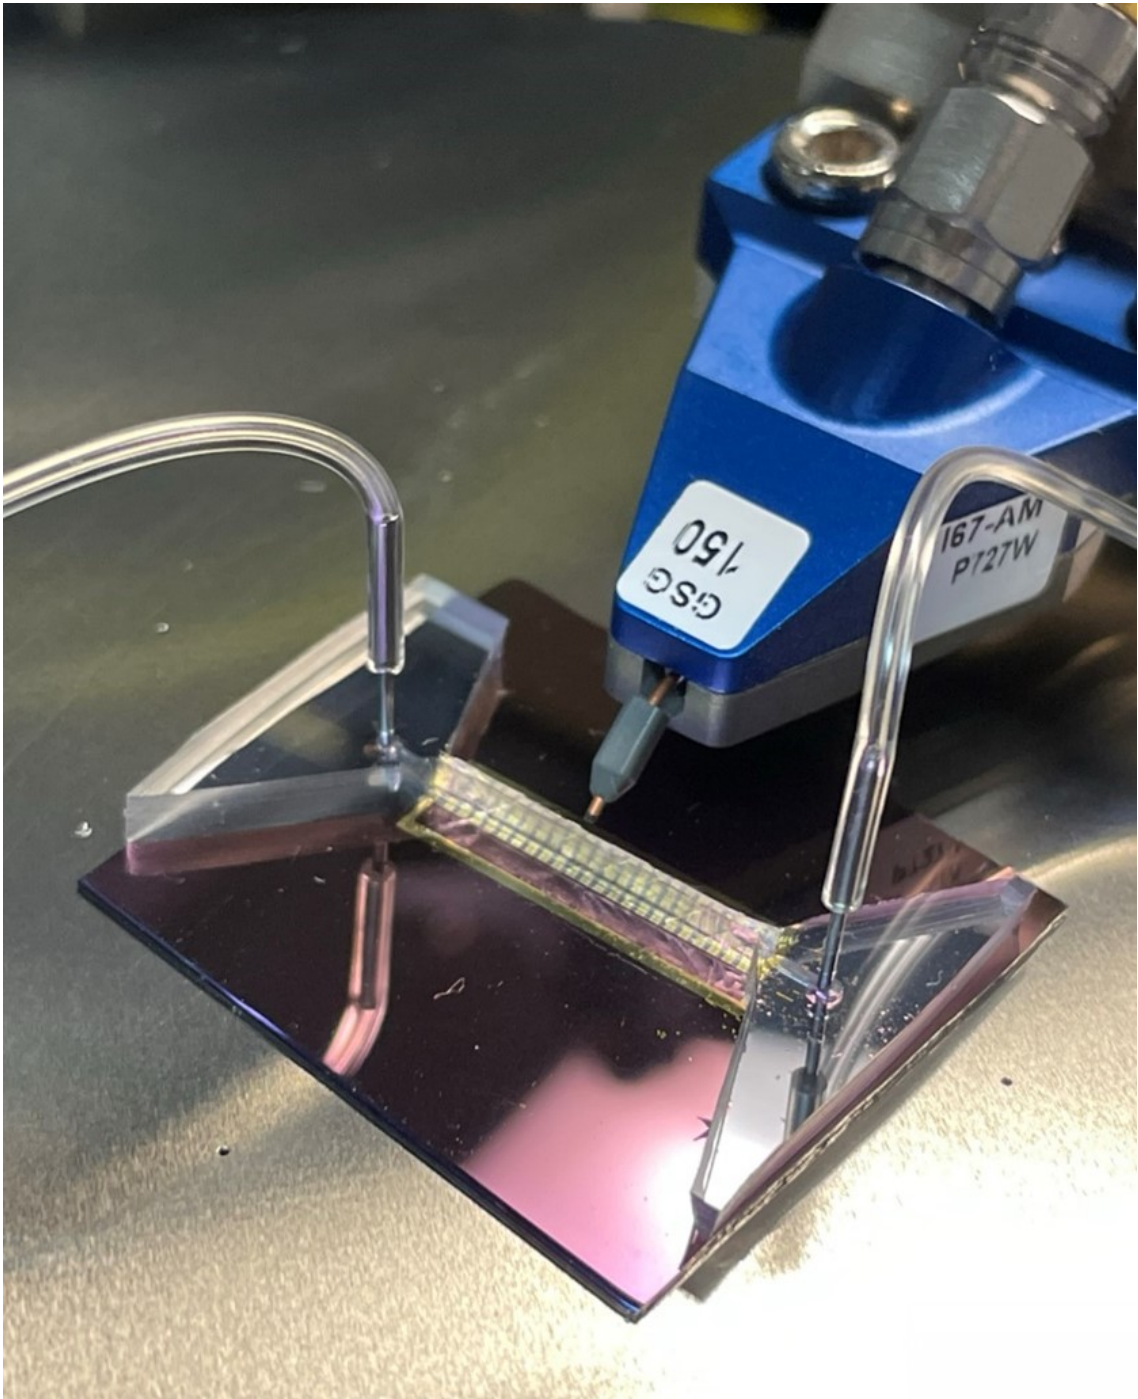

Figure 3: The array of devices with the microfluidic channel, without the DC probe and only one RF probe.

## 2 S-parameters

### 2.1 S-parameter plots of devices with channel length from 10 to 25 $\mu\text{m}$

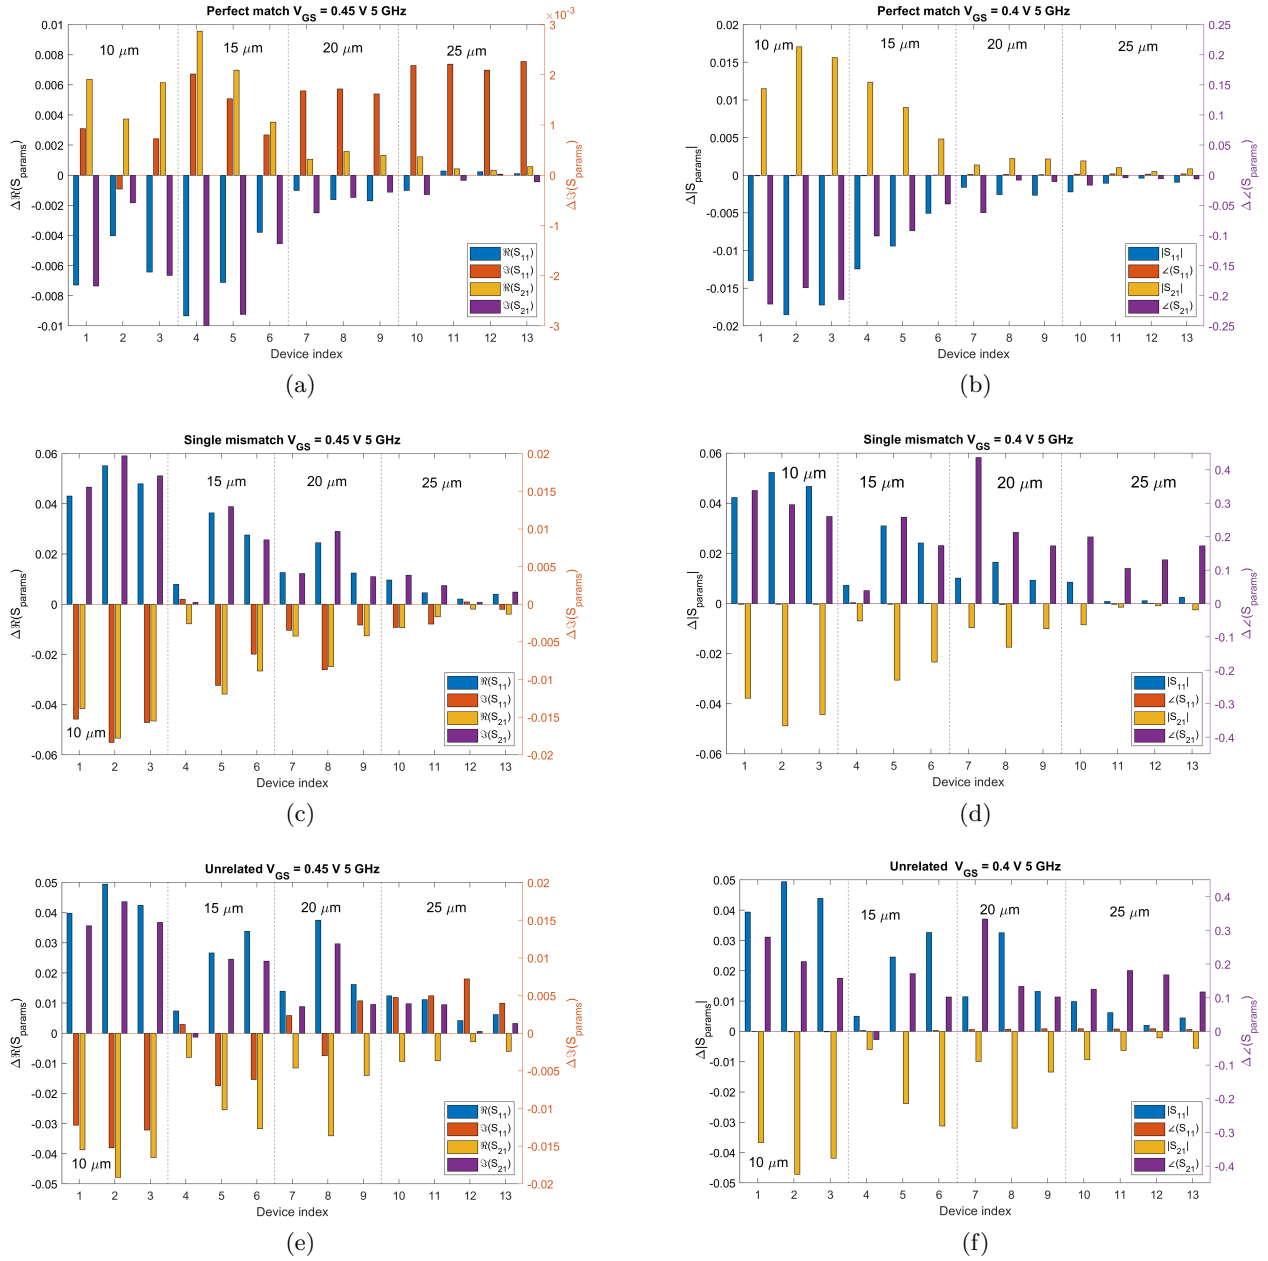

Figure 4: Bar graphs of the differences in the real, imaginary, amplitude, phase of  $S_{21}$  and  $S_{11}$  between the PBS baseline and pmDNA, smDNA, uDNA, respectively. Each group of the three/four bars is the result of an individual device. The frequency is 5 GHz. DNA concentration is 1 aM. The different colours represent different  $S$ -parameter parts. For better visualisation, the y-axis on the left applies to the blue and yellow (Real and magnitude) components, while the y-axis on the right is for the orange and purple (Imaginary and phase) components.

## 2.2 S-parameters at different DNA concentrations

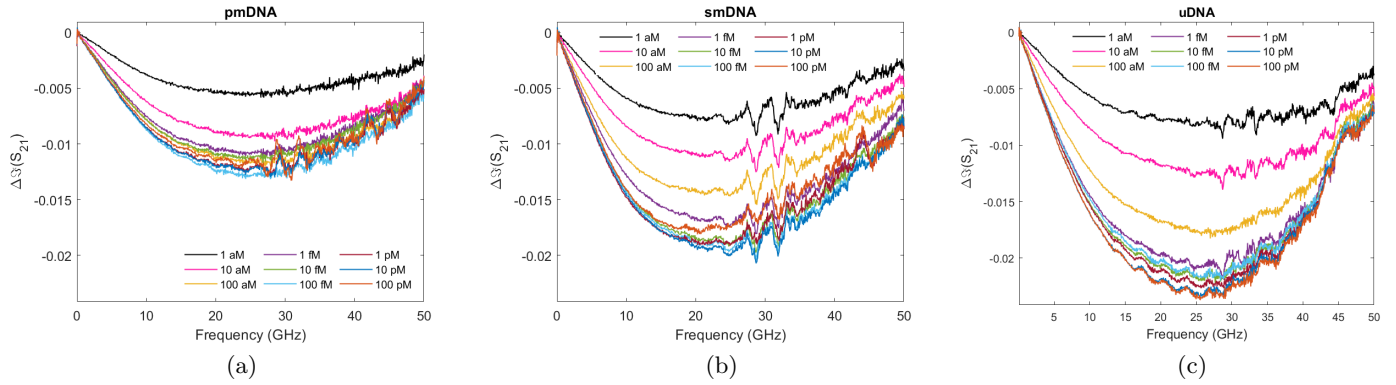

Figure 5: A representative set of the difference in  $\Im(S_{21})$  between the  $\Im(S_{21})$  at nine different DNA concentrations and the  $\Im(S_{21})$  at  $0.01\times$  PBS for a representative device with a graphene channel length of  $25\mu m$  for (a) pmDNA (b) smDNA and (c) uDNA. Graphene channel length is  $25\mu m$  at the gate voltage is  $0\text{ V}$ .

### 3 Machine learning

Table 1: ML model classification accuracy of pmDNA at nine concentrations: 1 aM, 10 aM, 100 aM, 1 fM, 10 fM, 100 fM, 1 pM, 10 pM, and 100 pM. Whole dataset: 2583 (7 devices \* 41 gate voltages \* 9 concentration classes)  $\times$  4 (4 principal components), training set: 2070  $\times$  4, testing set: 171  $\times$  4.

| Algorithms | Accuracy (%) | Accuracy with 30 dB Gaussian noise (%) |
|------------|--------------|----------------------------------------|
| LDA        | 100          | 100                                    |
| SVM        | 100          | 87.99                                  |
| Tree       | 99.75        | 98.04                                  |
| KNN        | 99.75        | 14.71                                  |
| ANN        | 100          | 100                                    |

Table 2: ML model classification accuracy of pmDNA, smDNA, and uDNA using the data at nine concentrations. Whole dataset: 6888 (7 devices \* 41 gate voltages \* 9 concentrations \* 3 DNA classes)  $\times$  9 (9 principal components), training set: 5520  $\times$  9, testing set: 1368  $\times$  9.

| Algorithms | Accuracy (%) |
|------------|--------------|
| LDA        | 76.46        |
| SVM        | 85.67        |
| Tree       | 92.03        |
| KNN        | 100          |
| ANN        | 100          |

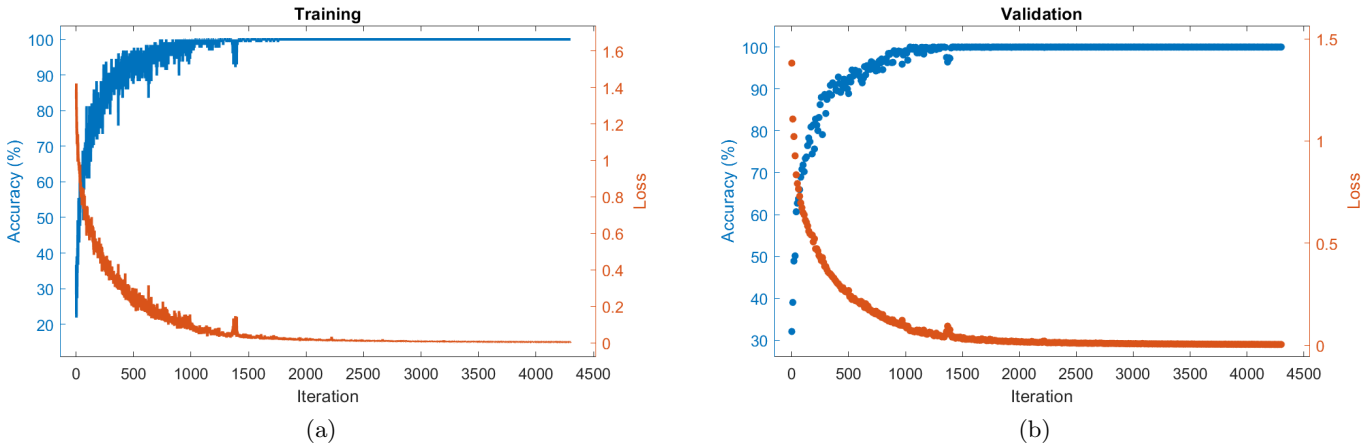

Figure 6: Accuracy and Loss curves of Training and Validation of ANN for the classification of pmDNA, smDNA, and uDNA using data at nine different concentrations. The validation accuracy is evaluated every ten iterations. Both validation and training accuracy increase with iterations and converge to 100%. Therefore, the model is capable of classifying the three classes of DNA even at different concentrations.
